# Supplementary material
Source: publisher figshare collection journal article supplement (https://tandf.figshare.com/articles/dataset/_/5350450)
Supplement: Supplementary file 1 [file 1]

Evaluation Form

Printed on Apr 06, 2017

medhub

Clerkship Evaluation of Student

Evaluator: \_\_\_\_\_

Evaluation of: \_\_\_\_\_

Date: \_\_\_\_\_

1. How long did you work with this student?\*

☐ Less than 4 hours

☐ 4 - 8 hours

☐ 1 - 3 days

☐ 3 - 7 days

☐ 1 - 2 weeks

☐ More than 2 weeks

2. Knowledge Base Description\*

|                          |                                               |                          |                                                    |                          |                                                     |                          |                                                    |                          |                                                                   |
|--------------------------|-----------------------------------------------|--------------------------|----------------------------------------------------|--------------------------|-----------------------------------------------------|--------------------------|----------------------------------------------------|--------------------------|-------------------------------------------------------------------|
| Not Directly Observed    | Inadequate with little improvement with time. |                          | Knows less than expected of student at this level. |                          | Knows as much as expected of student at this level. |                          | Knows more than expected of student at this level. |                          | Has an extraordinary fund of knowledge for student at this level. |
| 0                        | 1                                             | 2                        | 3                                                  | 4                        | 5                                                   | 6                        | 7                                                  | 8                        | 9                                                                 |
| <input type="checkbox"/> | <input type="checkbox"/>                      | <input type="checkbox"/> | <input type="checkbox"/>                           | <input type="checkbox"/> | <input type="checkbox"/>                            | <input type="checkbox"/> | <input type="checkbox"/>                           | <input type="checkbox"/> | <input type="checkbox"/>                                          |

3. Knowledge Base Improvement\*

|                          |                                                              |                          |                                                            |                          |                                                       |                          |                                                                            |                          |                                                              |
|--------------------------|--------------------------------------------------------------|--------------------------|------------------------------------------------------------|--------------------------|-------------------------------------------------------|--------------------------|----------------------------------------------------------------------------|--------------------------|--------------------------------------------------------------|
| Not Directly Observed    | Unaware of knowledge deficiencies, does not accept feedback. |                          | Accepts feedback but does not always correct deficiencies. |                          | Accepts feedback and corrects knowledge deficiencies. |                          | Independently assesses deficiencies and makes some effort to correct them. |                          | Accurately defines deficiencies, successfully corrects them. |
| 0                        | 1                                                            | 2                        | 3                                                          | 4                        | 5                                                     | 6                        | 7                                                                          | 8                        | 9                                                            |
| <input type="checkbox"/> | <input type="checkbox"/>                                     | <input type="checkbox"/> | <input type="checkbox"/>                                   | <input type="checkbox"/> | <input type="checkbox"/>                              | <input type="checkbox"/> | <input type="checkbox"/>                                                   | <input type="checkbox"/> | <input type="checkbox"/>                                     |

4. History Gathering Skills\*

|                          |                                                       |                          |                                                                        |                          |                                                            |                          |                                                                          |                          |                                                                        |
|--------------------------|-------------------------------------------------------|--------------------------|------------------------------------------------------------------------|--------------------------|------------------------------------------------------------|--------------------------|--------------------------------------------------------------------------|--------------------------|------------------------------------------------------------------------|
| Not Directly Observed    | Inaccurate and disorganized. Gathers inadequate data. |                          | Usually accurate, but less organized than most students at this level. |                          | Generally accurate with most significant issues addressed. |                          | All areas covered and better organized than most students at this level. |                          | Precise, complete coverage of all areas with outstanding organization. |
| 0                        | 1                                                     | 2                        | 3                                                                      | 4                        | 5                                                          | 6                        | 7                                                                        | 8                        | 9                                                                      |
| <input type="checkbox"/> | <input type="checkbox"/>                              | <input type="checkbox"/> | <input type="checkbox"/>                                               | <input type="checkbox"/> | <input type="checkbox"/>                                   | <input type="checkbox"/> | <input type="checkbox"/>                                                 | <input type="checkbox"/> | <input type="checkbox"/>                                               |

5. Physical Examination Skills\*

|                          |                                                                                                                                           |                          |                                                                                                                                             |                          |                                                                                                                                              |                          |                                                                                                                                                  |                          |                                                                                                                                       |
|--------------------------|-------------------------------------------------------------------------------------------------------------------------------------------|--------------------------|---------------------------------------------------------------------------------------------------------------------------------------------|--------------------------|----------------------------------------------------------------------------------------------------------------------------------------------|--------------------------|--------------------------------------------------------------------------------------------------------------------------------------------------|--------------------------|---------------------------------------------------------------------------------------------------------------------------------------|
| Not Directly Observed    | Consistently fails to do parts of the physical exam important to the case or consistently demonstrates unacceptable physical exam skills. |                          | Usually complete but has problems with some aspects of the exam or misinterprets findings. More omissions than most students at this level. |                          | Generally complete and accurate physical exam skills, can demonstrate aspects of exam when asked, often does not pick up on subtle findings. |                          | Excellent skills, picks up on some subtle findings. Comfortable in demonstrating physical examination. Skills beyond most students at this level |                          | Outstanding skills, correctly identifies all (including subtle) physical findings, knows what findings to expect and looks for these. |
| 0                        | 1                                                                                                                                         | 2                        | 3                                                                                                                                           | 4                        | 5                                                                                                                                            | 6                        | 7                                                                                                                                                | 8                        | 9                                                                                                                                     |
| <input type="checkbox"/> | <input type="checkbox"/>                                                                                                                  | <input type="checkbox"/> | <input type="checkbox"/>                                                                                                                    | <input type="checkbox"/> | <input type="checkbox"/>                                                                                                                     | <input type="checkbox"/> | <input type="checkbox"/>                                                                                                                         | <input type="checkbox"/> | <input type="checkbox"/>                                                                                                              |

6. Oral Presentations\*

|                          |                                                                              |                          |                                                                                    |                          |                                     |                          |                                                             |                          |                                              |
|--------------------------|------------------------------------------------------------------------------|--------------------------|------------------------------------------------------------------------------------|--------------------------|-------------------------------------|--------------------------|-------------------------------------------------------------|--------------------------|----------------------------------------------|
| Not Directly Observed    | Very disorganized. Leaves out important data or gives incorrect information. |                          | Lacks fluency; needs more help with organization than most students at this level. |                          | Thorough, reasonably well organized |                          | More concise and accurate than most students at this level. |                          | Exceptionally fluent, pertinent and concise. |
| 0                        | 1                                                                            | 2                        | 3                                                                                  | 4                        | 5                                   | 6                        | 7                                                           | 8                        | 9                                            |
| <input type="checkbox"/> | <input type="checkbox"/>                                                     | <input type="checkbox"/> | <input type="checkbox"/>                                                           | <input type="checkbox"/> | <input type="checkbox"/>            | <input type="checkbox"/> | <input type="checkbox"/>                                    | <input type="checkbox"/> | <input type="checkbox"/>                     |

7. Written Notes and Differential Diagnosis

Please describe the student's written notes and ability to generate a differential diagnosis\*

|                          |                                                         |                          |                                                                                      |                          |                                                                          |                          |                                                                 |                          |                                                                                      |
|--------------------------|---------------------------------------------------------|--------------------------|--------------------------------------------------------------------------------------|--------------------------|--------------------------------------------------------------------------|--------------------------|-----------------------------------------------------------------|--------------------------|--------------------------------------------------------------------------------------|
| Not Directly Observed    | Inaccurate and disorganized. Unable to define problems. |                          | Organization consistently weaker and less accurate than most students at this level. |                          | Organization at an acceptable level with information generally accurate. |                          | Better organized and accurate than most students at this level. |                          | Outstanding organization with systematic problem definition & complete differential. |
| 0                        | 1                                                       | 2                        | 3                                                                                    | 4                        | 5                                                                        | 6                        | 7                                                               | 8                        | 9                                                                                    |
| <input type="checkbox"/> | <input type="checkbox"/>                                | <input type="checkbox"/> | <input type="checkbox"/>                                                             | <input type="checkbox"/> | <input type="checkbox"/>                                                 | <input type="checkbox"/> | <input type="checkbox"/>                                        | <input type="checkbox"/> | <input type="checkbox"/>                                                             |

8. Clinical Performance Comments

Please comment on the student's overall CLINICAL PERFORMANCE (Knowledge base, interview, history and physical exam skills, organization, case presentations, write ups, follow ups, progress notes, oral presentation): \*

\_\_\_\_\_  
\_\_\_\_\_  
\_\_\_\_\_  
\_\_\_\_\_  
\_\_\_\_\_

|              |                                                                  |  |                                                   |  |                                                               |  |                                                   |  |                                                     |
|--------------|------------------------------------------------------------------|--|---------------------------------------------------|--|---------------------------------------------------------------|--|---------------------------------------------------|--|-----------------------------------------------------|
| Not Directly | Inappropriate, often tardy, unreliable, dishonest, self-serving. |  | Less dependable than most students at this level. |  | Aware of professional position and responsibilities. Behavior |  | Professional at all times, pleasant to work with. |  | Unusually mature and professional. Always courteous |
|--------------|------------------------------------------------------------------|--|---------------------------------------------------|--|---------------------------------------------------------------|--|---------------------------------------------------|--|-----------------------------------------------------|

|                     |                          |                          |                                                                                                      |                          |                                                   |                          |                                                                                |                          |                             |                          |
|---------------------|--------------------------|--------------------------|------------------------------------------------------------------------------------------------------|--------------------------|---------------------------------------------------|--------------------------|--------------------------------------------------------------------------------|--------------------------|-----------------------------|--------------------------|
|                     | Observed                 |                          | Often fails to follow through; assumes tasks with prodding. Inconsistent appearance. Sometimes late. |                          | and appearance appropriate for level of training. |                          | Appropriately accepts greater responsibility than most students at this level. |                          | and reliable. A role model. |                          |
|                     | 0                        | 1                        | 2                                                                                                    | 3                        | 4                                                 | 5                        | 6                                                                              | 7                        | 8                           | 9                        |
| 9. Professionalism* | <input type="checkbox"/> | <input type="checkbox"/> | <input type="checkbox"/>                                                                             | <input type="checkbox"/> | <input type="checkbox"/>                          | <input type="checkbox"/> | <input type="checkbox"/>                                                       | <input type="checkbox"/> | <input type="checkbox"/>    | <input type="checkbox"/> |

|                              |                          |                                                       |                          |                                                                     |                          |                                                            |                          |                                                      |                          |                                                              |
|------------------------------|--------------------------|-------------------------------------------------------|--------------------------|---------------------------------------------------------------------|--------------------------|------------------------------------------------------------|--------------------------|------------------------------------------------------|--------------------------|--------------------------------------------------------------|
|                              | Not Directly Observed    | Resistant to feedback, with little or no improvement. |                          | Accepts feedback but more passive than most students at this level. |                          | Improves with feedback. Completes educational assignments. |                          | More self-directed than most students at this level. |                          | Seeks and create learning opportunities for self and others. |
|                              | 0                        | 1                                                     | 2                        | 3                                                                   | 4                        | 5                                                          | 6                        | 7                                                    | 8                        | 9                                                            |
| 10. Motivation and Attitude* | <input type="checkbox"/> | <input type="checkbox"/>                              | <input type="checkbox"/> | <input type="checkbox"/>                                            | <input type="checkbox"/> | <input type="checkbox"/>                                   | <input type="checkbox"/> | <input type="checkbox"/>                             | <input type="checkbox"/> | <input type="checkbox"/>                                     |

|                                  |                          |                                                                                        |                          |                                                                                          |                          |                                                                  |                          |                                                                      |                          |                                                                                      |
|----------------------------------|--------------------------|----------------------------------------------------------------------------------------|--------------------------|------------------------------------------------------------------------------------------|--------------------------|------------------------------------------------------------------|--------------------------|----------------------------------------------------------------------|--------------------------|--------------------------------------------------------------------------------------|
|                                  | Not Directly Observed    | Unable to form constructive relationships with patients. Some behaviors inappropriate. |                          | Has more difficulty forming constructive relationships than most students at this level. |                          | Generally able to form constructive relationships with patients. |                          | Forms constructive relationships beyond most students at this level. |                          | Consistently forms alliances with a range of patients individualized to their needs. |
|                                  | 0                        | 1                                                                                      | 2                        | 3                                                                                        | 4                        | 5                                                                | 6                        | 7                                                                    | 8                        | 9                                                                                    |
| 11. Relationships with Patients* | <input type="checkbox"/> | <input type="checkbox"/>                                                               | <input type="checkbox"/> | <input type="checkbox"/>                                                                 | <input type="checkbox"/> | <input type="checkbox"/>                                         | <input type="checkbox"/> | <input type="checkbox"/>                                             | <input type="checkbox"/> | <input type="checkbox"/>                                                             |

|               |                          |                                         |                          |                                                        |                          |                                                                   |                          |                                                                                                      |                          |                                                                                                  |
|---------------|--------------------------|-----------------------------------------|--------------------------|--------------------------------------------------------|--------------------------|-------------------------------------------------------------------|--------------------------|------------------------------------------------------------------------------------------------------|--------------------------|--------------------------------------------------------------------------------------------------|
|               | Not Directly Observed    | Unable to work effectively with others. |                          | Sometimes tactless. Needs help understanding teamwork. |                          | Respects rights and needs of others. Generally exhibits teamwork. |                          | Works more effectively with all members of health team, more so than do most students at this level. |                          | Promotes harmony, anticipates and corrects potential problems. Exceptionally valued team member. |
|               | 0                        | 1                                       | 2                        | 3                                                      | 4                        | 5                                                                 | 6                        | 7                                                                                                    | 8                        | 9                                                                                                |
| 12. Teamwork* | <input type="checkbox"/> | <input type="checkbox"/>                | <input type="checkbox"/> | <input type="checkbox"/>                               | <input type="checkbox"/> | <input type="checkbox"/>                                          | <input type="checkbox"/> | <input type="checkbox"/>                                                                             | <input type="checkbox"/> | <input type="checkbox"/>                                                                         |

13. Personal and Professional Qualities Comments

Please comment on the student's PERSONAL AND PROFESSIONAL QUALITIES (Motivation, demeanor, psychosocial skills, relationships with patients and colleagues) \*

14. Student's Integrity, Ethics, Sensitivity

☐ (select one)  
☐ Yes  
☐ Uncertain  
☐ No

Have you seen anything that would lead you to question the student's integrity, ethics, or sensitivity to diversity?\*

Comments:

15. Summary Comments \*

16. Areas for Improvement Comments

Please describe areas for improvement. \*

|                                   |                          |                          |                          |                          |                          |                                       |                          |                          |                          |                                            |
|-----------------------------------|--------------------------|--------------------------|--------------------------|--------------------------|--------------------------|---------------------------------------|--------------------------|--------------------------|--------------------------|--------------------------------------------|
|                                   | Not Directly Observed    | Unacceptable             |                          | Below average            |                          | Average - a competent medical student |                          | Above average/ excellent |                          | Top 5% of students I have ever worked with |
|                                   | 0                        | 1                        | 2                        | 3                        | 4                        | 5                                     | 6                        | 7                        | 8                        | 9                                          |
| 17. Student's Overall Performance | <input type="checkbox"/>              | <input type="checkbox"/> | <input type="checkbox"/> | <input type="checkbox"/> | <input type="checkbox"/>                   |

Based upon your interactions and observations, rate this student's overall performance compared to other students at the same level of training. Again, we expect that about 80% of students will fall in the 4-6 category range.\*

18. Evaluation Shared with Student

☐ No  
☐ Yes

Was the content of your evaluation shared with the student?\*

Comments:

19. Please specify your level.\*

- ☐ R1
- ☐ R2
- ☐ R3
- ☐ R4
- ☐ R5
- ☐ R6
- ☐ Nurse Practitioner
- ☐ Health Professional
- ☐ Fellow
- ☐ Team Attending
- ☐ Preceptor Rounds Attending
