# Supplementary material
Source: publisher figshare collection journal article supplement (https://tandf.figshare.com/articles/dataset/_/5350450)
Supplement: Supplementary file 2 [file 1]

| <b>Evaluator</b>                                                 |             |             |             |             |             |             | <b>Overall Mean</b> |
|------------------------------------------------------------------|-------------|-------------|-------------|-------------|-------------|-------------|---------------------|
| Knowledge Base Description                                       | 9.00        | 9.00        | 7.00        | 9.00        | 7.00        | 6.00        | 7.75                |
| Knowledge Base Improvement                                       | 9.00        | 9.00        | 7.00        | 9.00        | 8.00        | 7.00        | 8.25                |
| History Gathering Skills                                         | 9.00        | 9.00        | 7.00        | 9.00        | 8.00        | 6.00        | 8.00                |
| Physical Examination Skills                                      | 8.00        |             | 7.00        | 9.00        |             | 5.00        | 7.00                |
| Oral Presentations                                               | 9.00        | 9.00        | 7.00        | 9.00        | 8.00        | 5.00        | 7.75                |
| Written notes/ differential diagnosis                            | 8.00        |             | 6.00        | 9.00        | 9.00        | 5.00        | 7.67                |
| Professionalism                                                  | 9.00        | 9.00        | 8.00        | 9.00        | 8.00        | 5.00        | 7.75                |
| Motivation and Attitude                                          | 9.00        | 9.00        | 8.00        | 9.00        | 9.00        | 5.00        | 8.00                |
| Relationships with Patients                                      | 9.00        |             | 7.00        | 9.00        | 9.00        | 5.00        | 7.67                |
| Teamwork                                                         | 9.00        | 9.00        | 7.00        | 9.00        | 9.00        | 5.00        | 8.00                |
| Overall performance compared to other students at the same level | 9.00        | 9.00        | 7.00        | 9.00        | 8.00        | 7.00        | 8.25                |
| <b>Evaluator Average</b>                                         | <b>8.82</b> | <b>9.00</b> | <b>7.09</b> | <b>9.00</b> | <b>8.30</b> | <b>5.55</b> | <b>7.83</b>         |

|                     |             |             |             |             |             |             |
|---------------------|-------------|-------------|-------------|-------------|-------------|-------------|
| Question integrity? | No          | No          | No          | No          | No          | No          |
| Diversity           | no concerns |
| Ethics              | no concerns |

## CLINICAL PERFORMANCE

Outstanding knowledge base, always working to learn more. Did frequent literature searches on his patients and presented evidence-based questions to the team. Histories and exams were excellent. Presentations had great flow and notes were well-written.

did an outstanding job. He is diligent, knowledgeable, enthusiastic, inquisitive, and humble. It's clear that he has mastered the skill of synthesizing clinical information and turning it into a coherent narrative, with a differential and a plan. One of the patients he presented to me on short notice was a complicated ICU patient who had been in the unit for weeks with multiple medical problems. I found it remarkable just how well he was able to separate the signal from the noise in this case, but more important, I was impressed by his ability to resist the temptation of rattling off a bunch of additional diagnostic tests and instead going right to the crux of the matter--how much any of this would really change the patient's management or ultimate outcome. On another occasion, he educated the whole group about the etiology of the coagulopathies seen in LVAD patients. He is already functioning at the level of a sub-I. He was an asset to our team, and the relationship was often a two-way street, with us learning from him as much as he hopefully learned from us.

Overall, a very solid performance. provided succinct H & Ps, with a well-structured differential and plan. Any critiques of his presentations were successfully addressed in subsequent cases.

Look, is the real deal. He is sincere, compassionate, and knows how to work. When you weld this to his medical knowledge he is the type of physician you want to take care of you in the future.

The details. . . he gets them. He asks about them, he looks for them in the context of the patients presentation. He knows how to gather an extensive HPI then whittle it down to the essentials for verbal presentations. He then replicates this with this physical examination, differential, and diagnosis. He is one of the best and most well rounded medical students I have ever seen. Additionally, he knows how to work in teams, and is an excellent communicator not only to patients and their families but to residents, attendings, nursing and ancillary staff. In our first week together we had multiple patients needing carotid end arterectomies and he professionally communicated the patients needs and the teams treatment plan with the surgical service. When all is said and done I would love to have him as a co-resident, but he will be incredibly valued in whatever arena of medicine he chooses.



impressed me during his first neurology patient encounter as he presented a clear and concise neurologic history, assessment and plan. He continues to demonstrate a similar level of clinical maturity throughout the rotation. On rare occasion he would stumble when formulating a differential dx on the spot, but recognized his knowledge gaps and worked to fill them prior to the next encounter.

was good at interviewing, obtaining a history, and performing a physical exam. His notes were at the appropriate level for his training.

#### PERSONAL/PROFESSIONAL QUALITIES

Excellent work-ethic. Took initiative with his patients, making calls and working with other staff to advance his patients' care. Very self-motivated. Has excellent rapport with patients and other team members.

See above

Enthusiastic and dependable. He worked well with peers and patients alike.

Please see above.

worked extremely well as a contributing member of our neurology team. During a week of low consult volume we worked together to engage our academic curiosities with informal presentations of clinical management in neurology.

was very motivated. HE had an enthusiastic demeanor. His relationships with the team as well as patients was mature. He has good psychosocial skills.

## SUMMARY COMMENTS

Outstanding job on the neurology clerkship. Functioning at the level of an intern. Works hard and is very invested in the patients he sees. will make an excellent physician.

As above

was an excellent student on the clerkship. His evaluations were above average for a UR student, which is a high bar. He brings a sense of maturity to the day-to-day proceedings of a clinical service, again beyond that of his peers. His base of knowledge was solid and he clearly focused on new areas of interest based on his patient's illnesses.

Please see above. Would make additional effort to recruit into Neurology.

performed extremely well for a medical student on his first neurology block. I anticipate that as he continues his neurology rotations, he will impress his supervising attendings as his exposure to neurology was a pleasure to work with. He was a critical part of our consultation team.

## AREAS FOR IMPROVEMENT

While not a major area of concern, I encourage taking the next step with presentations and giving them from memory.

As above

Tighten up the oral presentations a bit, expand background reading...Keep up the good work!

Further reading and exposure to imaging of different disease entities.

should continue to see patients with varying neurologic presentations in order to expand his knowledge base. He should continue to read on these topics as they present.
